# Supplementary material for: Physical Activity, Diet Quality, and Risk of Prostate Cancer Grade Reclassification on Active Surveillance: Results from a Prospective Cohort Study
Source: Research Square preprint supplement (doi:10.21203/rs.3.rs-6657111/v1), 2025-05-20
Supplement: Supplementary file 1 [file d4d9f9aa1af7474f99033d19.docx]

Supplemental Table 1. Patient Questionnaire, administered to facilitate calculations of METS from physical activity.1,2

|  | **A. Hours Per Week** | | | | | | | **B. Months Per Year** | | | | | |
| --- | --- | --- | --- | --- | --- | --- | --- | --- | --- | --- | --- | --- | --- |
| **Activity** | Not at All | ½ | 1 | 2-3 | 4-6 | 7-10 | 11+ | Not at All | ½ - 1 | 2 – 3 | 4 – 6 | 7 – 9 | 10+ |
| Walking or hiking  for exercise |  |  |  |  |  |  |  |  |  |  |  |  |  |
| Jogging (slower than 10 minutes/mile) |  |  |  |  |  |  |  |  |  |  |  |  |  |
| Running (10 minutes per mile or faster) |  |  |  |  |  |  |  |  |  |  |  |  |  |
| Bicycling (include  stationary machine) |  |  |  |  |  |  |  |  |  |  |  |  |  |
| Lap swimming |  |  |  |  |  |  |  |  |  |  |  |  |  |
| Tennis, squash,  Racquetball |  |  |  |  |  |  |  |  |  |  |  |  |  |
| Calisthenics, rowing,  aerobics, boxing, stair or ski machines |  |  |  |  |  |  |  |  |  |  |  |  |  |
| Weight lifting or weight machine |  |  |  |  |  |  |  |  |  |  |  |  |  |
| Basketball, football, hockey, baseball |  |  |  |  |  |  |  |  |  |  |  |  |  |
| Heavy outdoor work  (heavy lifting, digging, chopping wood, shoveling snow) |  |  |  |  |  |  |  |  |  |  |  |  |  |
| Other lawn work  (raking, mowing, gardening) |  |  |  |  |  |  |  |  |  |  |  |  |  |
| Other activities* (Specify): |  |  |  |  |  |  |  |  |  |  |  |  |  |

*Other activities not included in calculation due to inability to quantify MET equivalent.

Supplemental Table 2: METs coefficient assigned by type of activity or exercise type. Based on the Compendium of Physical Activities.3

| **Activity** | **METs/hour** |
| --- | --- |
| Walking | 4.2 |
| Jogging | 7 |
| Running | 10.4 |
| Bicycling | 7.5 |
| Lap swimming | 8.3 |
| Tennis | 7.3 |
| Calisthenics etc. | 6.9 |
| Weight Lift | 5 |
| Baseball, football etc. | 7.5 |
| Heavy Outdoor Activity | 4.9 |
| Other Lawn Care | 4 |

**Supplemental Table 3**.Association between baseline clinicopathological and modifiable risk factors and prostate cancer grade reclassification during active surveillance, with physical activity level categorized in tertiles

|  | Grade reclassification to ≥GG2 | | |  | Grade reclassification to ≥GG3 | | |
| --- | --- | --- | --- | --- | --- | --- | --- |
| (No. events/N: 167/806) | | | (No. events/N: 51/806) | | |
| Characteristic | SHR | 95% CI | *p* |  | SHR | 95% CI | *p* |
| ***Clinicopathological factors*** |  |  |  |  |  |  |  |
| Year of diagnosis | 1.08 | 1.004 – 1.17 | **.04** |  | 1.05 | 0.92 – 1.21 | .46 |
| Patient age at diagnosis, years | 1.05 | 1.02 – 1.08 | **.002** |  | 1.10 | 1.04 – 1.17 | **.001** |
| Black race (vs. non-Black) | 0.80 | 0.42 – 1.54 | .51 |  | 0.23 | 0.03 – 1.69 | .15 |
| Prostate-specific antigen density (per 0.1 ng/mL2 increase) | 1.05 | 0.85 – 1.29 | .68 |  | 1.06 | 0.73 – 1.54 | .76 |
| Number of positive biopsy cores at diagnosis | 1.06 | 0.86 – 1.30 | .59 |  | 1.03 | 0.77 – 1.39 | .83 |
| Maximum percent core involved with cancer (per 10% increase) | 1.10 | 1.01 – 1.20 | **.02** |  | 1.04 | 0.89 – 1.22 | .58 |
| Use of pre-enrollment mpMRI (vs. not) | 0.96 | 0.60 – 1.54 | .87 |  | 0.99 | 0.35 – 2.74 | .98 |
| ***Modifiable risk factors*** |  |  |  |  |  |  |  |
| Smoking history (vs. none) | 1.03 | 0.75 – 1.40 | .87 |  | 1.19 | 0.68 – 2.08 | .54 |
| Energy-adjusted Healthy Eating Index score (per SD increasea) | 0.86 | 0.74 – 0.998 | **.047** |  | 0.74 | 0.58 – 0.95 | **.02** |
| MET hours per week |  |  | .996 |  |  |  | .90 |
| First tertile (<12.0) | Reference |  |  |  | Reference |  |  |
| Second tertile (12.0 – 20.9) | 0.95 | 0.65 – 1.37 |  |  | 0.92 | 0.48 – 1.76 |  |
| Third tertile (≥21.0) | 1.00 | 0.69 – 1.44 |  |  | 0.95 | 0.47 – 1.92 |  |

*Note:* Multivariable regression models used complete case analysis by excluding 22 patients with missing data (2.7%); *p*-values <0.05 bolded.

a SD = 12.5 for energy-adjusted Healthy Eating Index score

*Abbreviations:* CI, confidence interval; GG, Grade Group; MET, metabolic equivalent of task; mpMRI, multiparametric magnetic resonance imaging; SD, standard deviation; SHR, subdistribution hazard ratio.

References

1. Ainsworth BE, Haskell WL, Whitt MC, et al. Compendium of Physical Activities: an update of activity codes and MET intensities: *Medicine & Science in Sports & Exercise*. 2000;32(Supplement):S498-S516. doi:10.1097/00005768-200009001-00009

2. Herrmann SD, Willis EA, Ainsworth BE. The 2024 Compendium of Physical Activities and its expansion. *Journal of Sport and Health Science*. 2024;13(1):1-2. doi:10.1016/j.jshs.2023.09.008

3. Compendium of Physical Activities: Quantifying Physical Activity Energy Expenditure. Accessed February 26, 2025. https://pacompendium.com/adult-compendium/
